# Supplementary material for: Construction of Hexagonal Prism-like Defective BiOCL Hierarchitecture for Photocatalytic Degradation of Tetracycline Hydrochloride
Source: MDPI journal article supplement (doi:10.3390/nano12152700), 2022-08-05
Supplement: s1 [file s1]

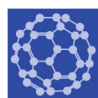

Supplementary Material

# Construction of Hexagonal Prism-Like Defective BiOCl Hierarchical Structure for Photocatalytic Degradation of Tetracycline Hydrochloride

Lijun Hu <sup>1,2,\*</sup>, Zhichao Ding <sup>1,2</sup>, Fei Yan <sup>1,2</sup>, Kuan Li <sup>1,2</sup>, Li Feng <sup>3</sup>, and Hongqing Wang <sup>1,2,\*</sup>

<sup>1</sup> School of Chemistry and Chemical Engineering, University of South China, Hengyang 421001, China

<sup>2</sup> Hunan Key Laboratory for the Design and Application of Actinide Complexes, University of South China, Hengyang 421001, China

<sup>3</sup> School of Civil and Transportation Engineering, Guangdong University of Technology, Guangzhou 510006, China

\* Correspondence: lijun.hu@usc.edu.cn (L.H.); hqwang@usc.edu.cn (H.W.)

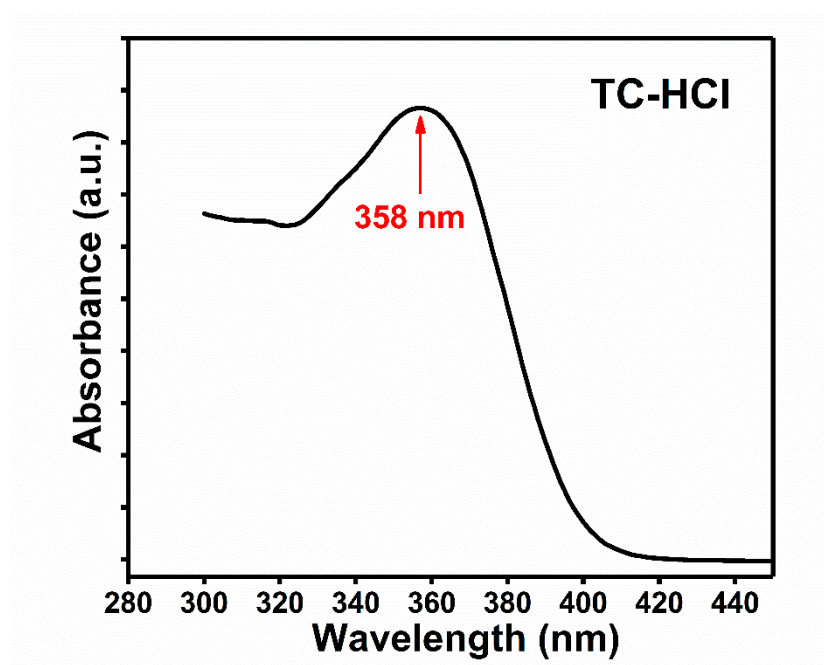

Figure S1. UV-Vis spectrum of TC-HCl.

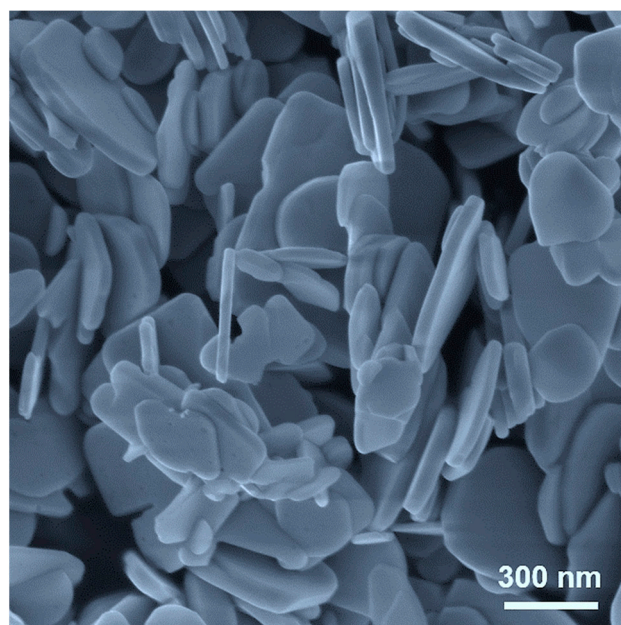

Figure S2. SEM picture of BiOCl.

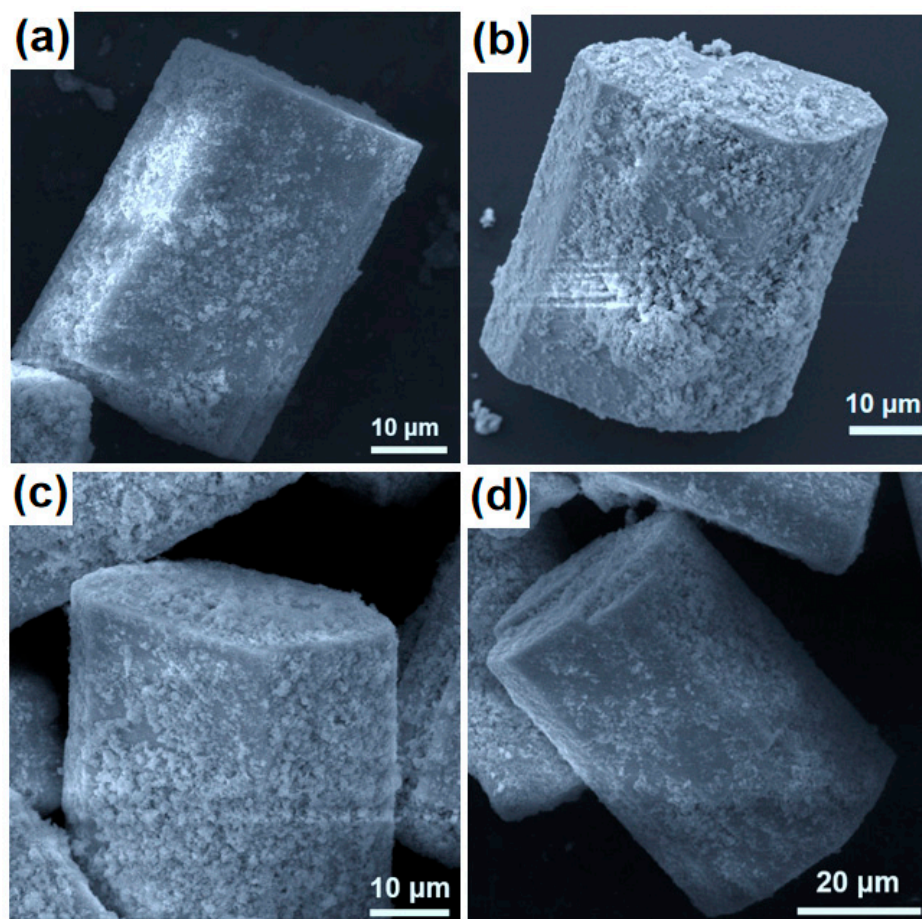

Figure S3. SEM pictures of 3D-BiOCl.

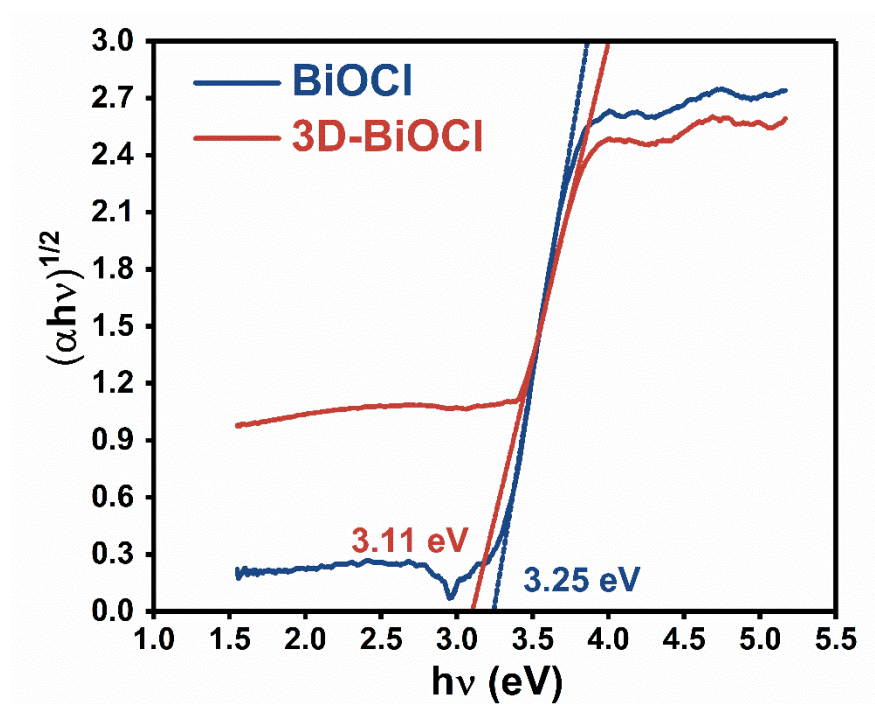

**Figure S4.** Plots of  $(\alpha h\nu)^{1/2}$  versus photon energy ( $h\nu$ ) for BiOCl (blue) and 3D-BiOCl (red).
